# Supplementary material
Source: PubMed Central journal article supplement (PMC5319717)
Supplement: DB160695SupplementaryData.pdf [file DB160695SupplementaryData.pdf]

SUPPLEMENTARY DATA

**Glomerular endothelial mitochondrial dysfunction is essential and characteristic of diabetic kidney disease susceptibility .**

Ilse Daehn<sup>1#</sup>, Haiying Qi<sup>1</sup>, Gabriella Casalena<sup>1</sup>, Shaolin Shi<sup>1</sup>, Liping Yu<sup>1</sup>, Kerstin Ebefors<sup>2</sup>, Yezhou Sun<sup>1</sup>, Weijia Zhang<sup>1</sup>, ViveGe D'Agati<sup>3</sup>, Detlef Schlondorff<sup>1</sup>, Börje Haraldsson<sup>2</sup>, Erwin Böttinger<sup>1</sup>

SUPPLEMENTARY DATA

**Supplementary Figure 1. Body weight (BW) and fasting blood glucose (FBG) in STZ treated and Akita mice.**

Bar graph shows the mean  $\pm$ SD of BW in A) control or STZ treated B6 or D2 mice and B) Akita B6 or D2 mice at baseline, 3, 6, 12 weeks of diabetes as indicated. FBG levels  $\pm$ SD of C) control or STZ treated B6 or D2 mice, and of D) Akita B6 or D2 mice at baseline, 3, 6, 12 weeks of diabetes. \* $P < 0.05$ , \*\* $P < 0.01$ , or #  $P < 0.001$ .

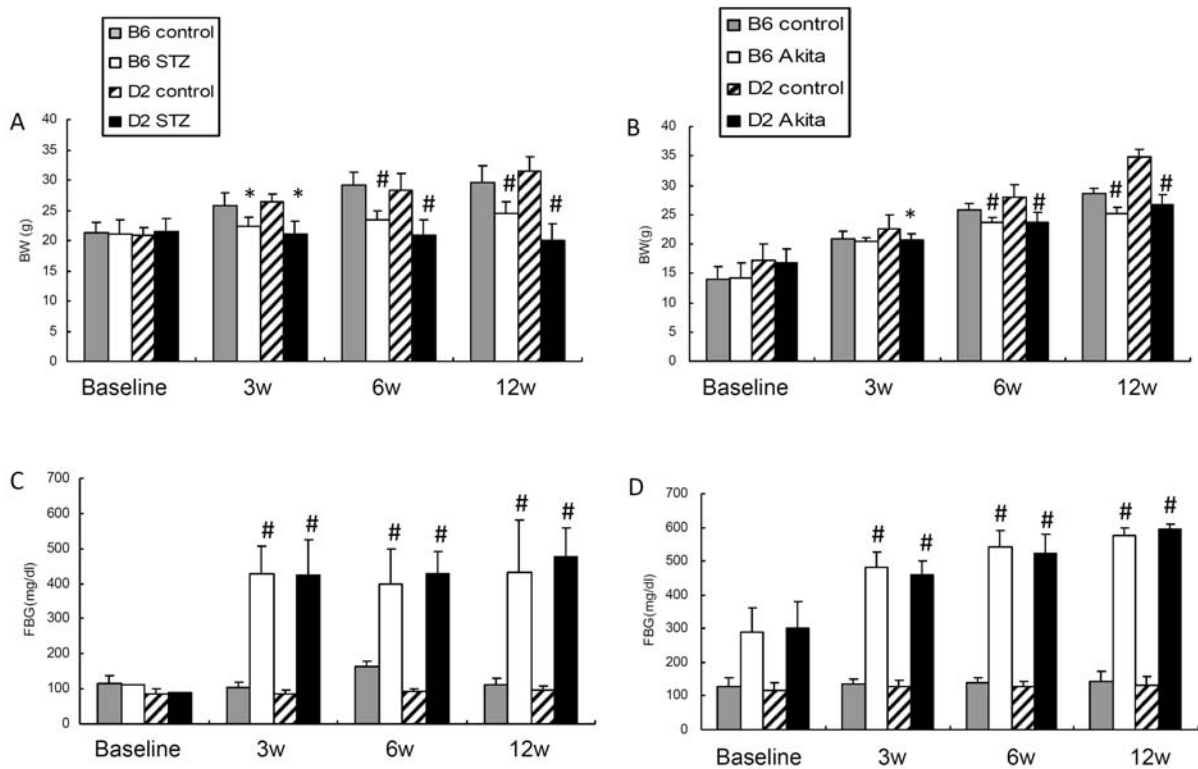

SUPPLEMENTARY DATA

**Supplementary Figure 2. Mitochondrial gene expression in diabetic B6 and D2 mice glomeruli**

Total RNA was prepared from glomeruli and cell lysates (Qiagen, Valencia, CA) and reversely transcribed into single strand cDNA with SuperScript II reverse transcriptase (Life Technologies, Invitrogen). The cDNA was amplified using SYBR-Green PCR Master Mix (Applied Biosystems) and gene-specific exon-exon junction spanning primers (sequences available upon request), normalized the murine beta-actin gene or Gapdh. Relative mRNA expression levels of selected respiratory chain complex genes in STZ treated B6 and D2 mice with A) 3 weeks and B) 6 weeks of diabetes compared with respective non-diabetic controls. \*P < 0.05, \*\*P < 0.01.

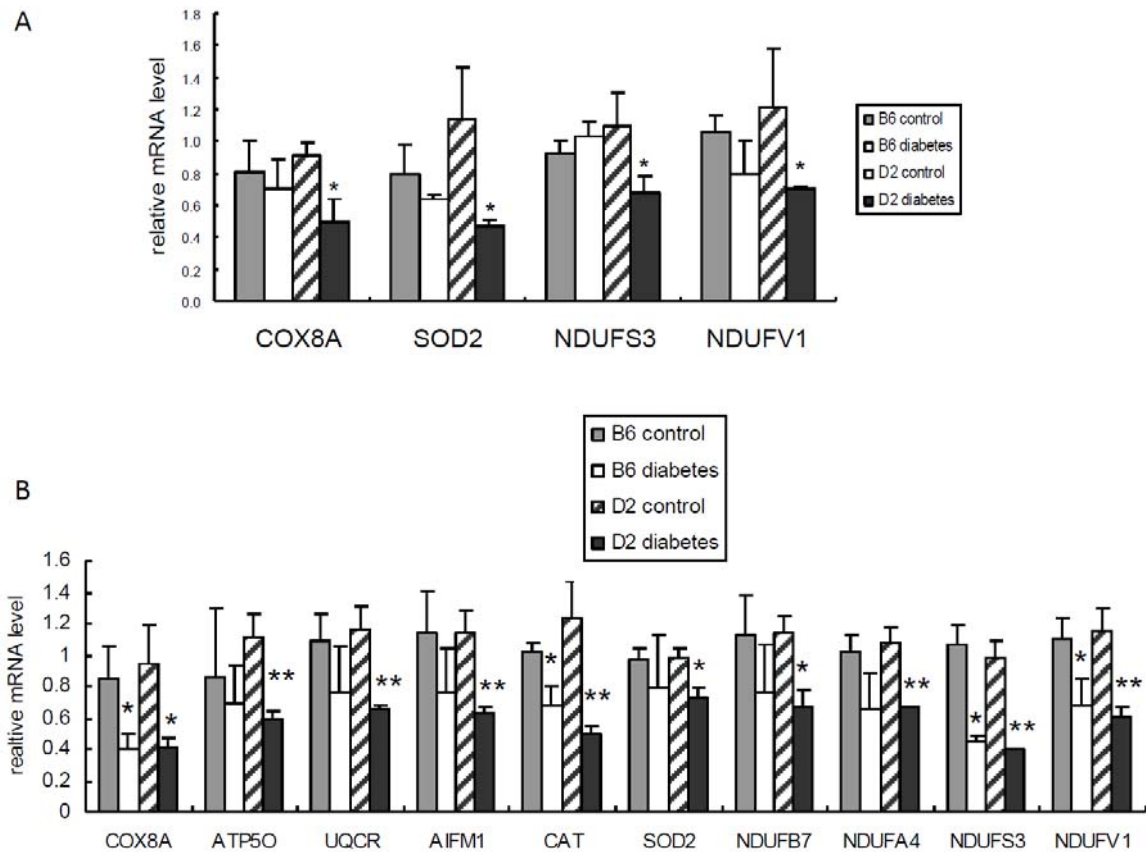

SUPPLEMENTARY DATA

**Supplementary Figure 3. MitoTEMPO ameliorated glomerulosclerosis of STZ-D2 and Akita-D2 diabetic mice**

A) FBG levels of control, STZ-D2 and STZ-D2 co-treated with mitoTEMPO with 3 weeks of diabetes. PAS staining of D2 kidneys B) STZ-D2 mice showing severe sclerosis, C) STZ-D2 co-treated with mitoTEMPO (1mg/kg/day). D) Sclerosis score of STZ-D2 with/without mitoTEMPO. PAS staining of E) Akita-D2 mice, F) Akita-D2 co-treated with mitoTEMPO (1mg/kg/day) and G) Sclerosis index score of Akita-D2 with/without mitoTEMPO. The Sclerosis index score in D) and E) was performed as previously described (1), for each glomerulus and graded from 0 to 4+ as follows: 0 represents no lesion, 1+ represents sclerosis of <25% of the glomerulus, while 2+, 3+, and 4+ represents sclerosis of >25% to 50%, >50% to 75%, and >75% of the glomerulus. + P<0.05, \*\*P <0.01, ns not significant.

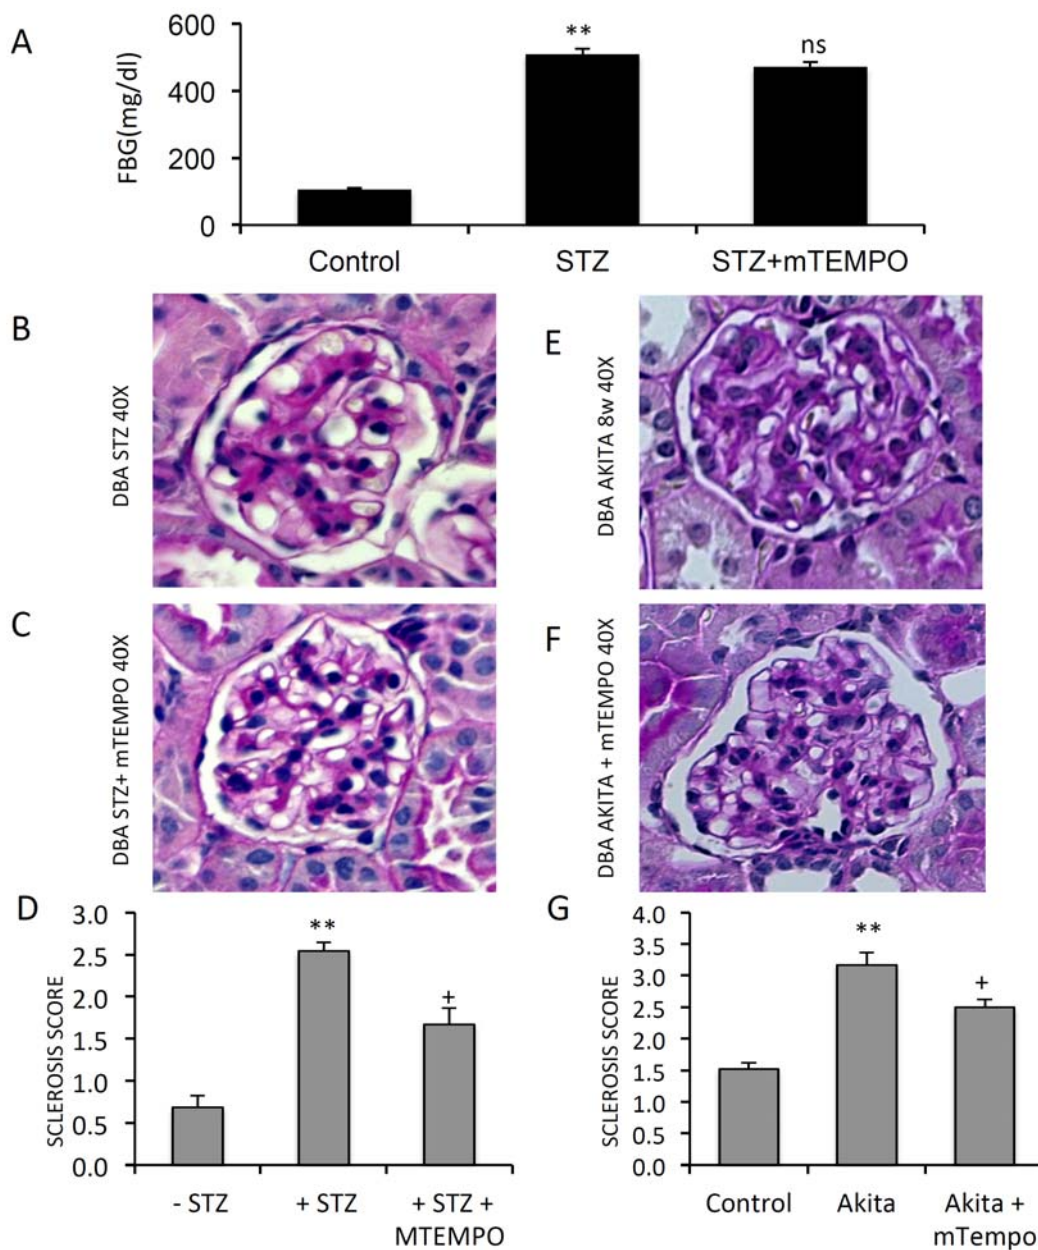

SUPPLEMENTARY DATA

**Supplementary Figure 4. BQ-123 does not affect STZ-D2 FBG**

A) FBG levels of control, STZ-D2 and STZ-D2 co-treated with BQ-123 with 3 weeks of diabetes. \*\*P < 0.01, ns not significant.

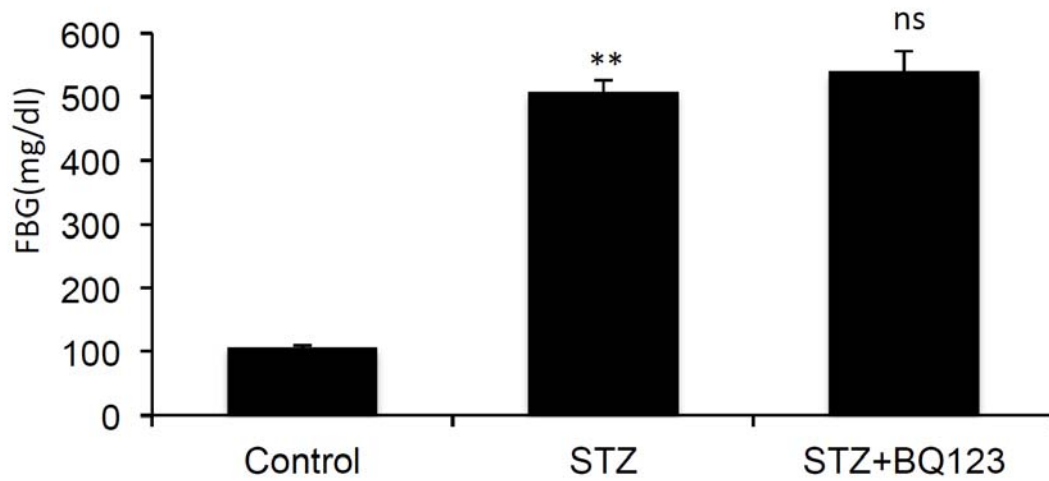

SUPPLEMENTARY DATA

**Supplementary Figure 5. hGluc induced mStress in mGECs**

8oxoG and TFAM staining of mGEC controls and mGECs in hGluc for 24h.

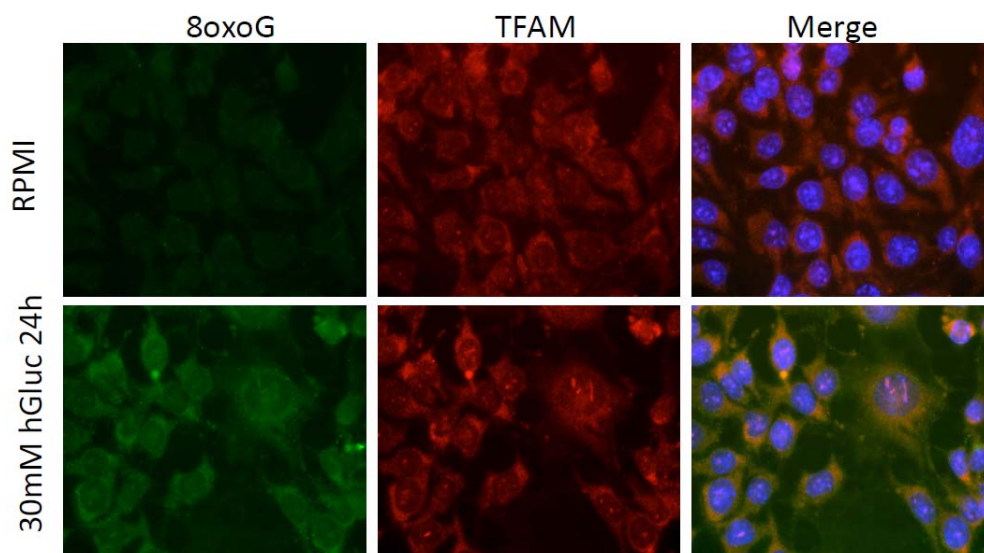

SUPPLEMENTARY DATA

**Supplementary Figure 6. mitochondrial and endothelial function with hGlu treatment of mGECs**

A) baseline OCR, ATP linked OCR calculated as the difference between basal and oligomycin-sensitive OCR, and reserve capacity OCR of mGEC controls (glucose (5mM) + D-mannitol (25mM)), or treated with hGlu, or NOS inhibitor L-NAME. B) eNOS activity of mGEC controls in RPMI, or treated with hGlu, or NOS inhibitor L-NAME.

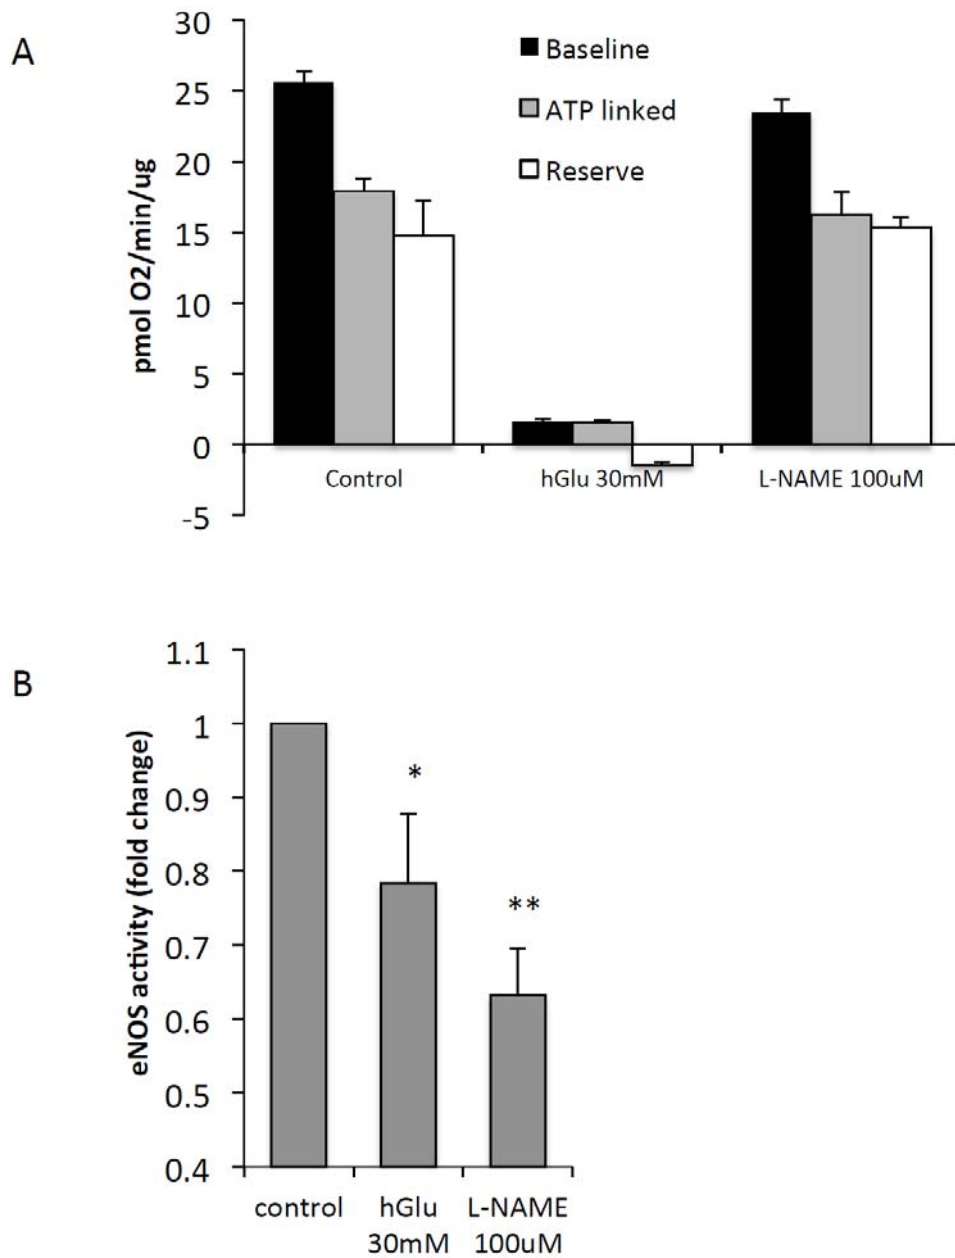

SUPPLEMENTARY DATA

**Supplementary Table 1.**

Top ten differentially represented pathways in glomeruliaser 6 weeks of diabetes. # Down suggests reduced pathway activity, \* Up suggests increased pathway activity

| Ingenuity Canonical Pathways                                    | Ratio (reg. genes/total pathway (%)) |               |
|-----------------------------------------------------------------|--------------------------------------|---------------|
|                                                                 | Down                                 | Up            |
| 6 weeks of diabetes (DBA/2J STZ : DBA/2J control)               |                                      |               |
| 1. Oxidative Phosphorylation                                    | 33/166 (20%) #                       | 1/166 (1%)    |
| 2. Mitochondrial Dysfunction                                    | 29/172 (17%) #                       | 3/172 (2%)    |
| 3. Nitrogen Metabolism                                          | 10/134 (7%) #                        | 1/134 (1%)    |
| 4. LPS/IL-1 Mediated Inhibition of RXR Function                 | 15/205 (7%) #                        | 8/205 (4%)    |
| 5. Sulfur Metabolism                                            | 6/61 (10%) #                         | 0/61 (0%)     |
| 6. Xenobiotic Metabolism Signaling                              | 19/294 (6%) #                        | 7/294 (2%)    |
| 7. Crosstalk between Dendritic Cells and Natural Killer Cells   | 2/98 (2%)                            | 9/98 (9%) *   |
| 8. Activation of IRF by Cytosolic Pattern Recognition Receptors | 1/73 (1%)                            | 8/73 (11%) *  |
| 9. Antigen Presentation Pathway                                 | 0/39 (0%)                            | 6/39 (15%) *  |
| 10. Dendritic Cell Maturation                                   | 3/173 (2%)                           | 12/173 (7%) * |



SUPPLEMENTARY DATA

**Supplementary Table 2.** Selected respiratory chain complex genes involved in mitochondrial function and oxidative phosphorylation (OXPHOS).

| Symbol | Gene name                                                                      | Pathways                          |
|--------|--------------------------------------------------------------------------------|-----------------------------------|
| AIFM1  | apoptosis-inducing factor, mitochondrion-associated, 1                         | Mitochondrial dysfunction         |
| ATP5O  | ATP synthase, H <sup>+</sup> transporting, mitochondrial F1 complex, O subunit | OXPHOS                            |
| CAT    | catalase                                                                       | Mitochondrial dysfunction         |
| GSR    | glutathione reductase                                                          | OXPHOS                            |
| COX6A1 | cytochrome c oxidase subunit VIa polypeptide 1                                 | Mitochondrial dysfunction, OXPHOS |
| COX6B1 | cytochrome c oxidase subunit VIb polypeptide 1                                 | Mitochondrial dysfunction, OXPHOS |
| COX7C  | cytochrome c oxidase subunit VIIc                                              | Mitochondrial dysfunction, OXPHOS |
| COX8A  | cytochrome c oxidase subunit 8A (ubiquitous)                                   | Mitochondrial dysfunction, OXPHOS |
| COX5B  | cytochrome c oxidase subunit Vb                                                | Mitochondrial dysfunction, OXPHOS |
| NDUFS8 | NADH dehydrogenase (ubiquinone) Fe-S protein 8                                 | Mitochondrial dysfunction, OXPHOS |
| NDUFV1 | NADH dehydrogenase (ubiquinone) flavoprotein 1                                 | Mitochondrial dysfunction, OXPHOS |
| NDUFS3 | NADH dehydrogenase (ubiquinone) Fe-S protein 3                                 | Mitochondrial dysfunction, OXPHOS |
| NDUFA4 | NADH dehydrogenase (ubiquinone) 1 alpha subcomplex, 4                          | Mitochondrial dysfunction, OXPHOS |
| NDUFB7 | NADH dehydrogenase (ubiquinone) 1 beta subcomplex, 7                           | Mitochondrial dysfunction, OXPHOS |
| NDUFA3 | NADH dehydrogenase (ubiquinone) 1 alpha subcomplex 3                           | Mitochondrial dysfunction, OXPHOS |
| NDUFB9 | NADH dehydrogenase (ubiquinone) 1 beta subcomplex 9                            | Mitochondrial dysfunction, OXPHOS |
| PRDX3  | peroxiredoxin 3                                                                | Mitochondrial dysfunction         |
| SOD2   | superoxide dismutase 2, mitochondrial                                          | Mitochondrial dysfunction         |
| UQCR   | ubiquinol-cytochrome c reductase,                                              | OXPHOS                            |

SUPPLEMENTARY DATA

**Supplementary Table 3.** Human pathology report

|                           | n | DM type | mean BMI     | % HTN | mean age      | Female:Male |
|---------------------------|---|---------|--------------|-------|---------------|-------------|
| <b>control</b>            | 6 | none    | 24.1 +/- 2.5 | 0%    | 37 +/- 18.5   | 1:5         |
| <b>mild to moderate</b>   | 7 | 2       | 29.1 +/- 6.6 | 100%  | 63.2 +/- 15.7 | 0:7         |
| <b>mild to moderate</b>   | 1 | 1       | 28.4         | 100%  | 28.0          | 0:1         |
| <b>Moderate to severe</b> | 5 | 2       | N/A          | 100%  | 46.8 +/- 10.1 | 3:2         |
| <b>Advanced</b>           | 1 | 2       | N/A          | 100%  | 51            | 1:0         |

**REFERENCES**

1. Ma, L.J., and Fogo, A.B. 2003. Model of robust induction of glomerulosclerosis in mice: importance of genetic background. *Kidney Int.* 64:350-355.
